# Supplementary material for: MiR-223-3p promotes cell proliferation and metastasis by downregulating SLC4A4 in clear cell renal cell carcinoma
Source: PubMed Central journal article supplement (PMC6366987; doi:10.18632/aging.101763), 2019-01-22
Supplement: aging-11-101763-s001.pdf [file aging-11-101763-s001.pdf]

## SUPPLEMENTARY MATERIAL

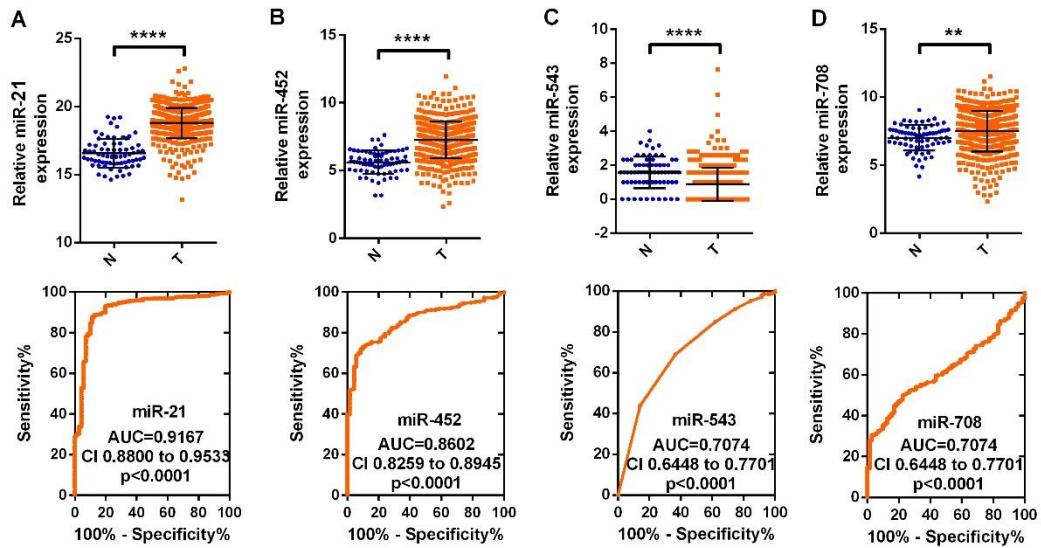

**Supplementary Figure 1. External comparison of miRNAs expressions in the Cancer Genome Atlas ccRCC dataset and AUC. (A) for miR-21 and (B) for miR-452, (C) for miR-543 and (D) for miR-708. \*\* P < 0.01; \*\*\* P < 0.001, \*\*\*\* P < 0.0001.**

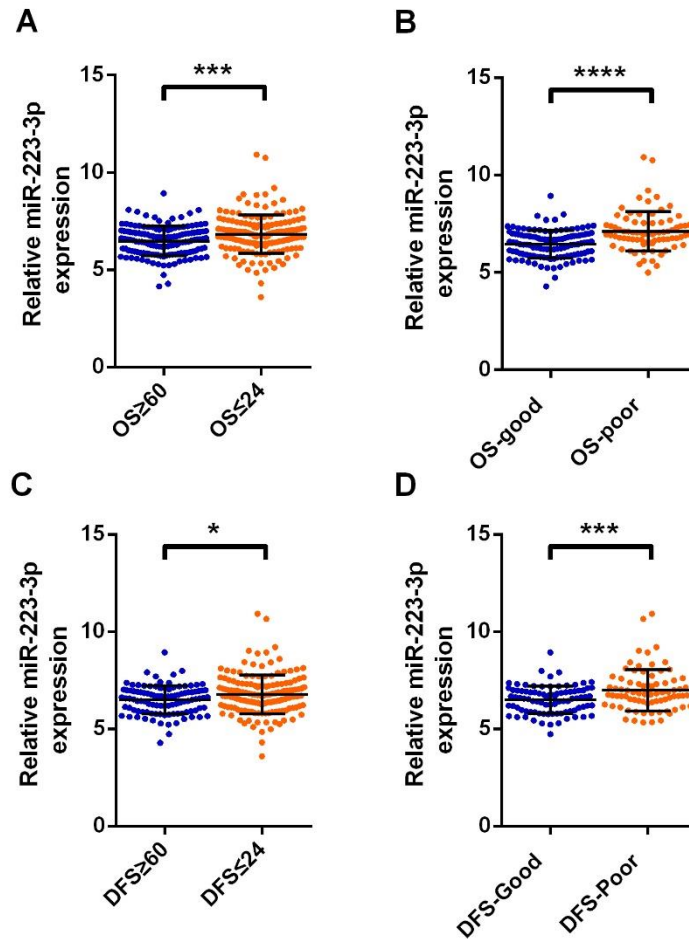

**Supplementary Figure 2. The correlation between miR-223-3p expression and long and short OS and DFS of ccRCC patients.** MiRNA levels between patients with good and poor prognosis were compared by independent sample t-test. (A) for long and short OS, (B) for good and poor prognosis of OS, (C) for long and short DFS, (D) for good and poor prognosis of DFS. \*  $P < 0.05$ , \*\*  $P < 0.01$ ; \*\*\*  $P < 0.001$ , \*\*\*\*  $P < 0.0001$ .
